# Supplementary material
Source: ML conference proceedings conference paper supplement (https://openreview.net/forum?id=Buddj8Ijcl9)

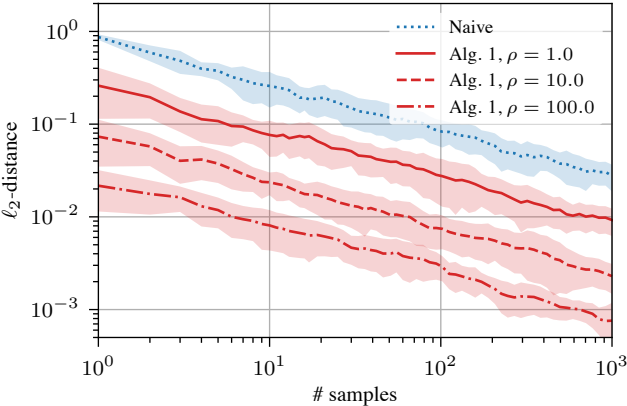

Supplement: supplementary_material [file attachment]

State occupancy

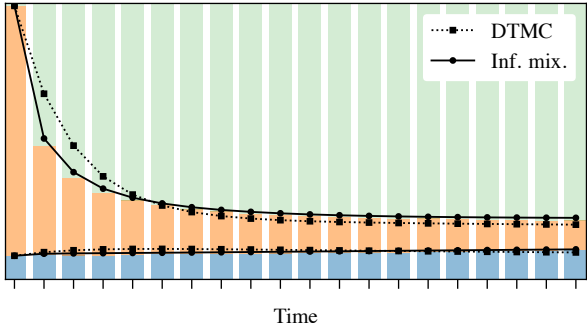

Time

DTMC  
Inf. mix.

Supplement: supplementary_material [file attachment]

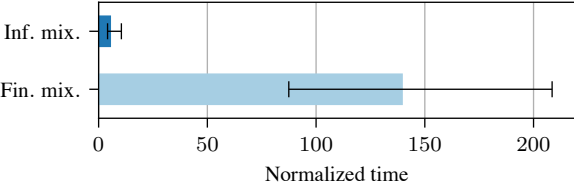

Supplement: supplementary_material [file attachment]

ebmt

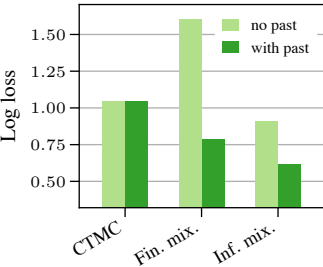

customers

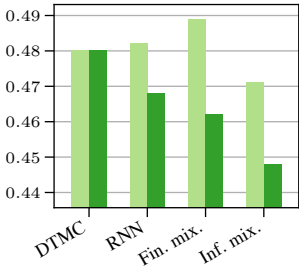

Supplement: supplementary_material [file attachment]

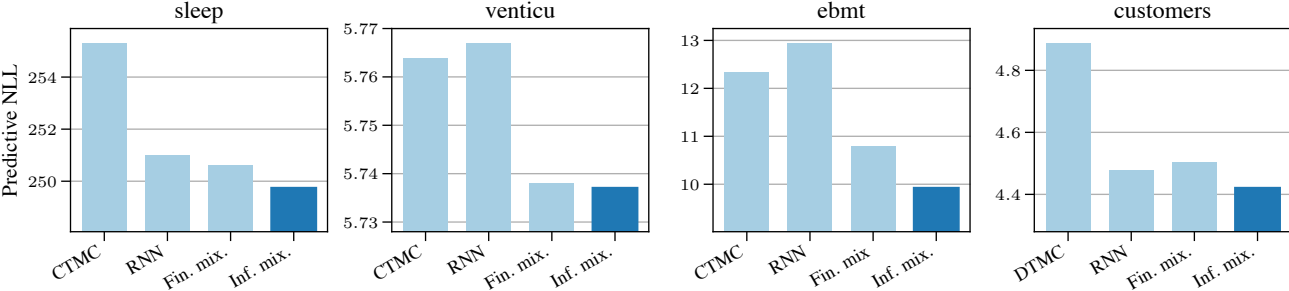

Supplement: supplementary_material [file attachment]

ebmt

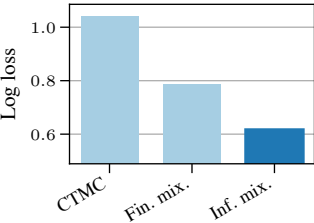

customers

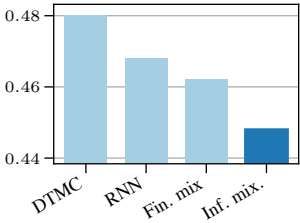

Supplement: supplementary_material [file attachment]
